# Supplementary material
Source: PubMed Central journal article supplement (PMC8687737)
Supplement: NIHMS1763540-supplement-1.pdf [file NIHMS1763540-supplement-1.pdf]

## Prevalence of overweight and obesity

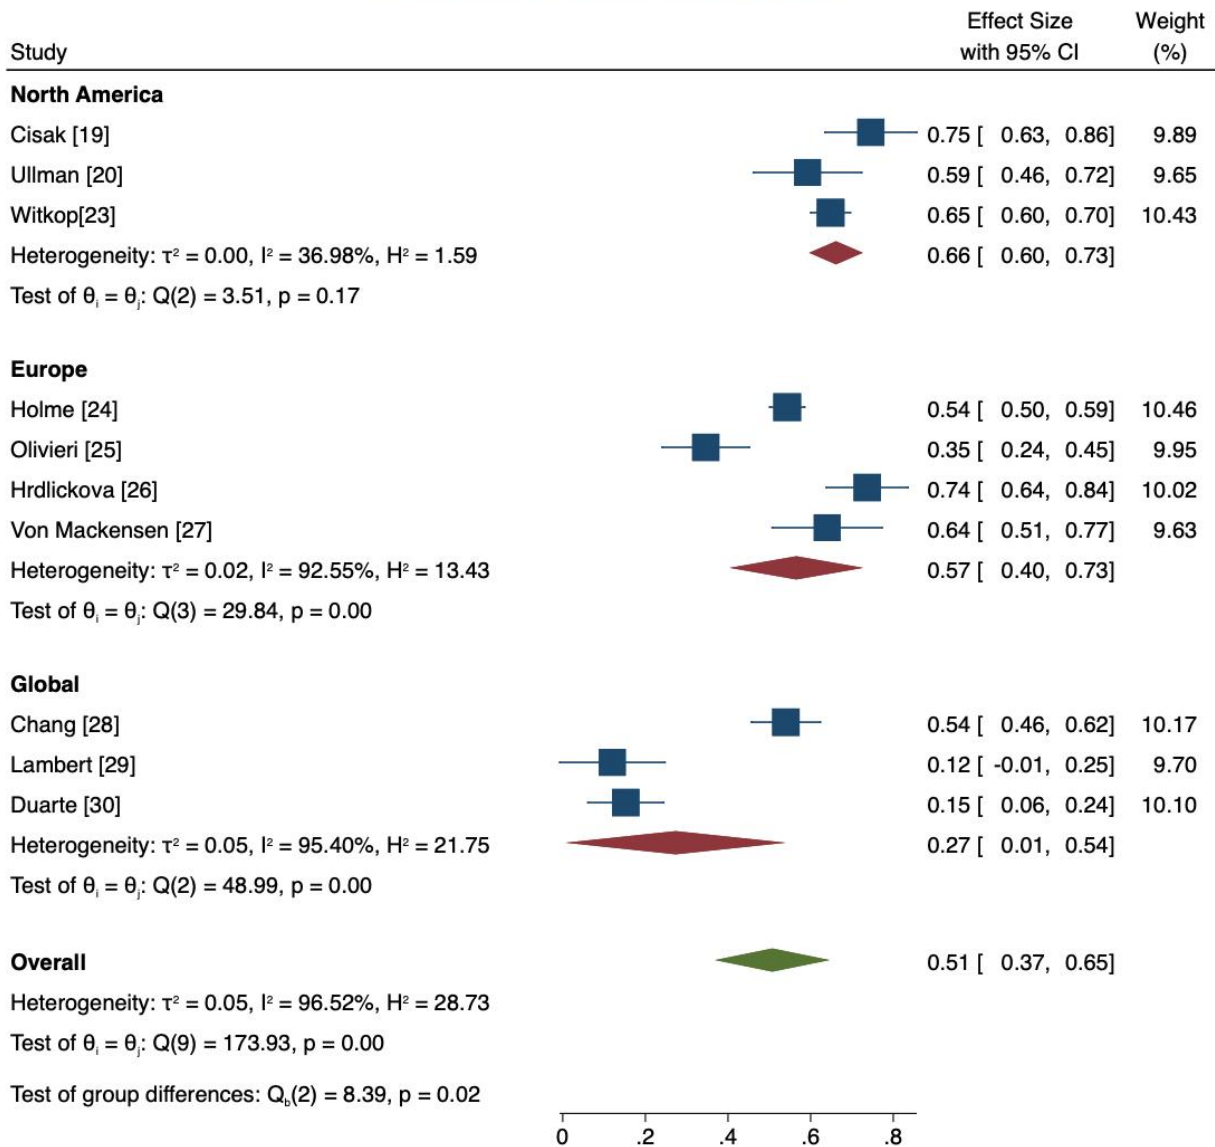

0 .2 .4 .6 .8

Random-effects REML model

Prevalence of obesity

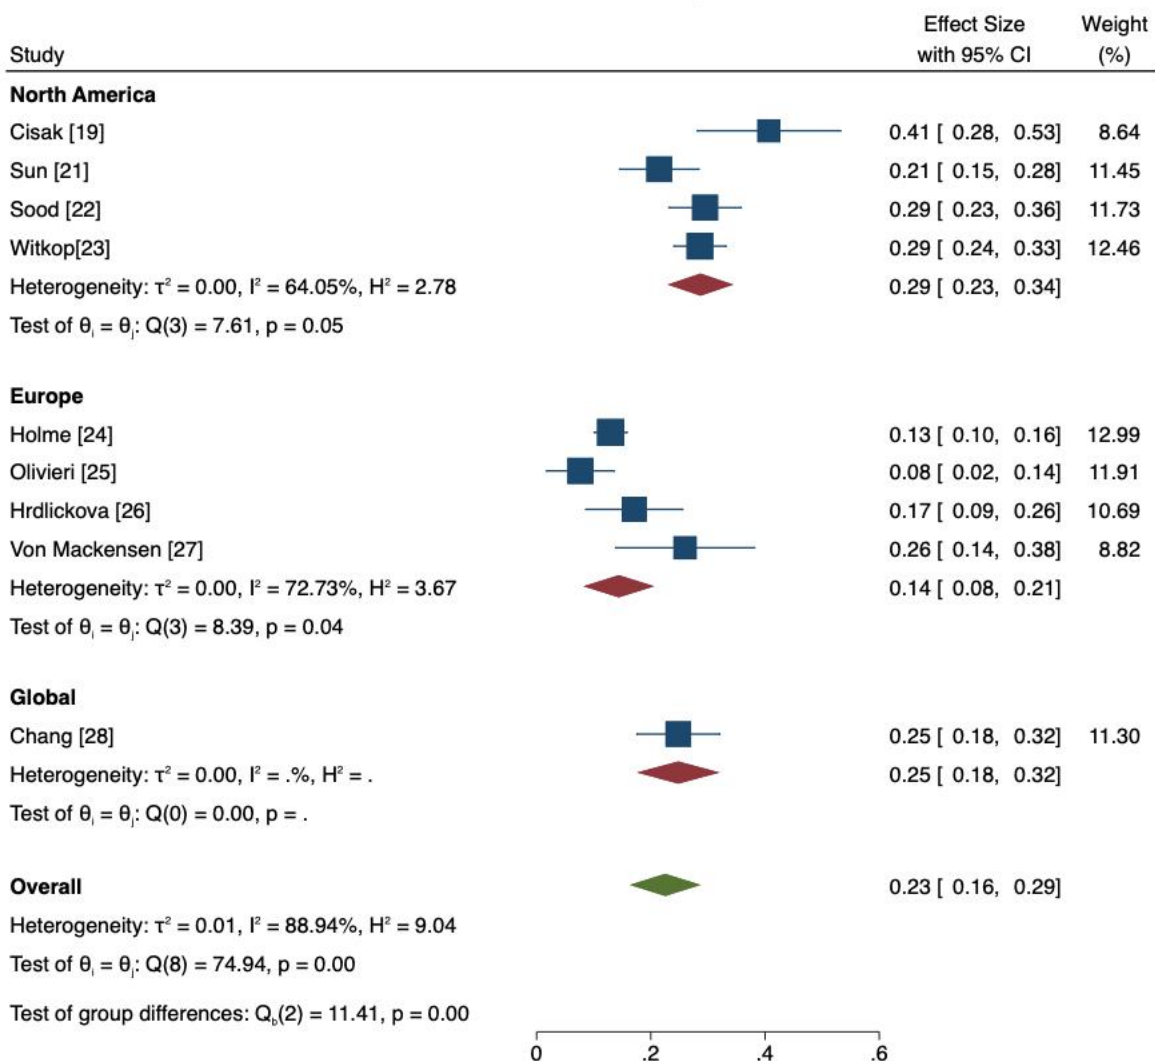

Random-effects REML model

Search terms used for PubMed

((("Hemophilia A"[Mesh] OR "Hemophilia B"[Mesh] OR Haemophilia [tiab] OR hemophilia [tiab] OR hemophiliac [tiab] OR haemophiliac [tiab] OR "Factor VIII Deficiency" [tiab] OR "Factor 8 Deficiency" [tiab] OR subhemophilia [tiab] OR "ahf deficiency" [tiab] OR "ahg deficiency" [tiab] OR "antihemophilic factor deficiency" [tiab] OR "antihaemophilic globulin deficiency" [tiab] OR "antihemophilic globulin deficiency" [tiab] OR hemophyilia [tiab] OR "factor ix deficiency" [tiab] OR "christmas disease" [tiab])) AND ("Obesity"[Mesh] OR obesity [tiab] OR obese [tiab] OR overweight [tiab] OR "adipose tissue hyperplasia" [tiab] OR adipositas [tiab] OR adiposity [tiab] OR "body weight" [tiab] OR corpulency [tiab] OR "fat overload syndrome" [tiab] OR obesitas [tiab] OR corpulence [tiab])) AND (2011:2020[pdat]))
